# Supplementary material for: Conflictos olvidados de Asia
Source: Royal Society of Chemistry journal article supplement (doi:10.1039/d2sc01160c), 2007-01-01
Supplement: d2sc01160c1.pdf [file d2sc01160c1.pdf]

## Supporting Information

### Polyoxometalate Steric Hindrance Driven Chirality-Selective Separation of Subnanometer Carbon Nanotubes

Xusheng Yang, Chao Zhu, Lianduan Zeng, Weiyang Xue, Luyao Zhang, Lei Zhang, Kaitong Zhao, Min Lyu, Lei Wang, Yuan-Zhu Zhang, Xiao Wang\*, Yan Li\*, and Feng Yang\*

#### Supporting Results

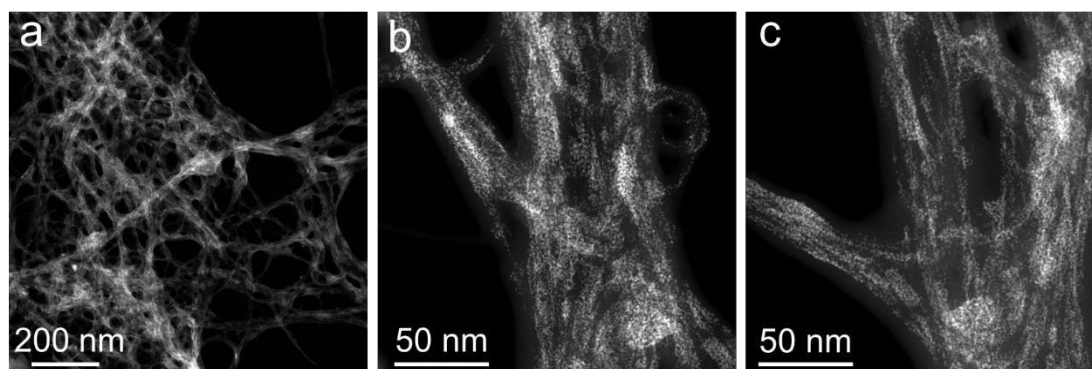

**Figure S1.** a–c, Typical HAADF-STEM images of  $\{PW_{12}\}$ -CoMo-SWCNTs.

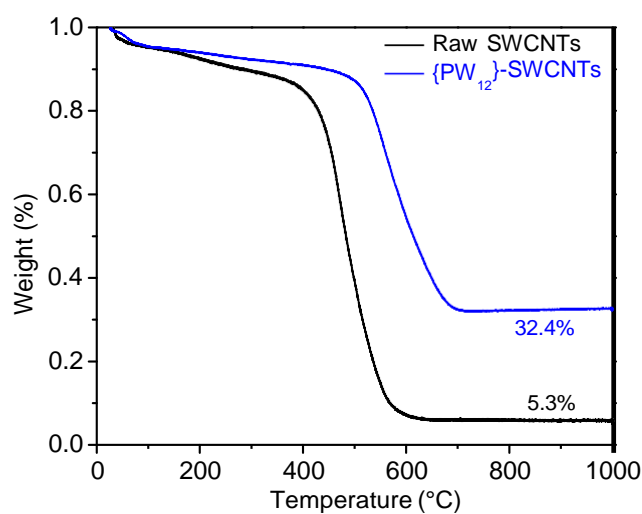

**Figure S2.** Thermogravimetric curves of  $\{PW_{12}\}$ -SWCNTs and raw SWCNTs.

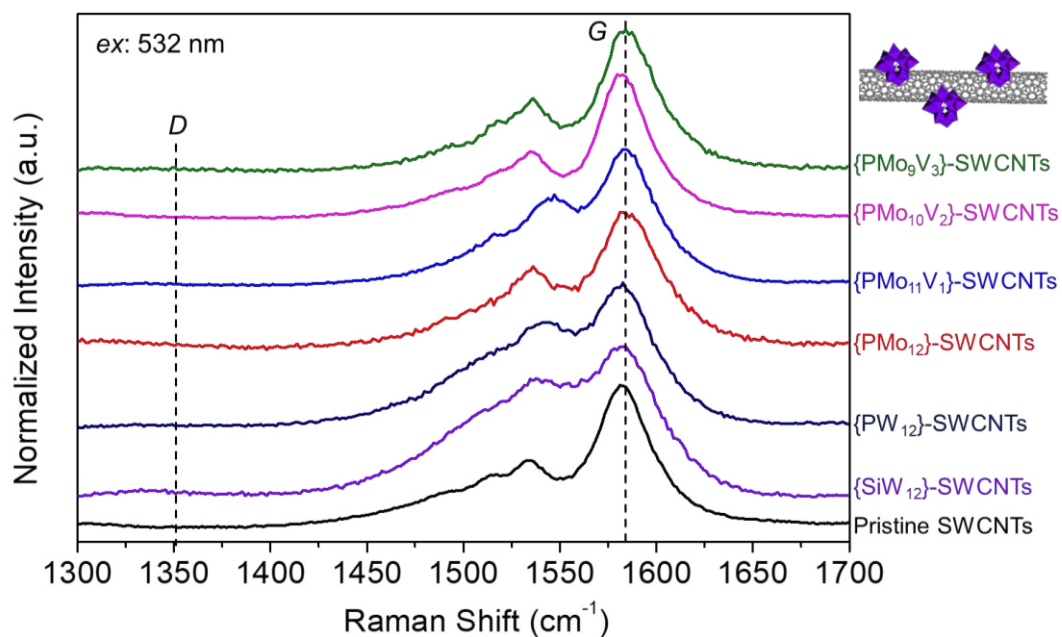

**Figure S3.** Raman spectra of polyoxometalate-SWCNTs and pristine SWCNTs. The spectra were normalized with respect to the intensity of *G* bands. A laser filter (25%) was applied to the powder sample to avoid any laser heating effect induced Raman shift.

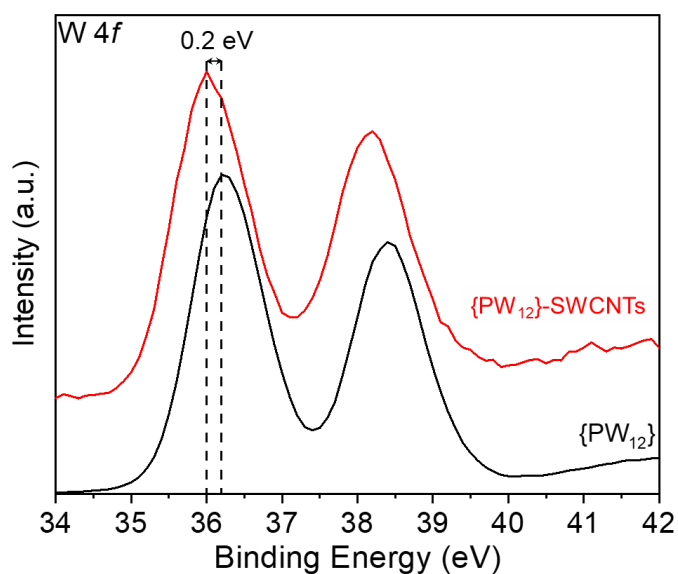

**Figure S4.** XPS spectra of  $\{PW_{12}\}$  and  $\{PW_{12}\}$ -SWCNTs.

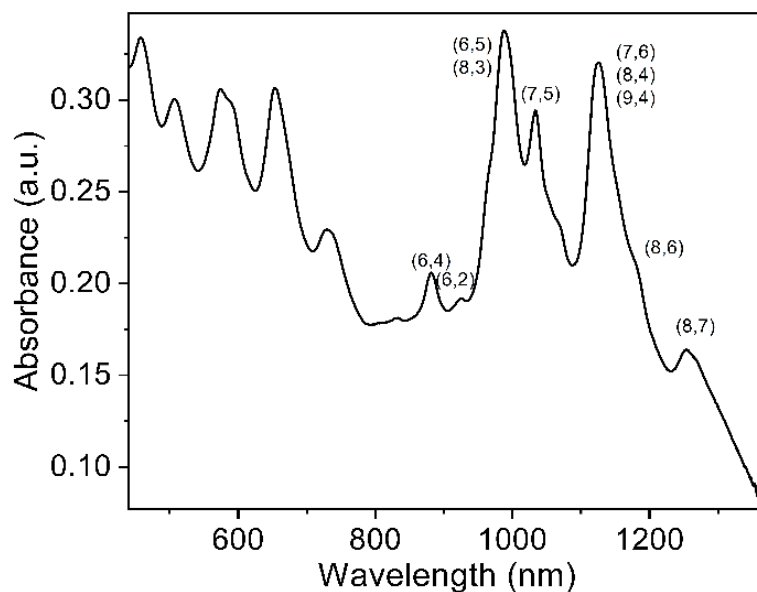

**Figure S5.** Absorption spectra of sodium deoxycholate dispersed raw CoMo-SWCNTs, indicating the non-selective chiral indices in raw sample.

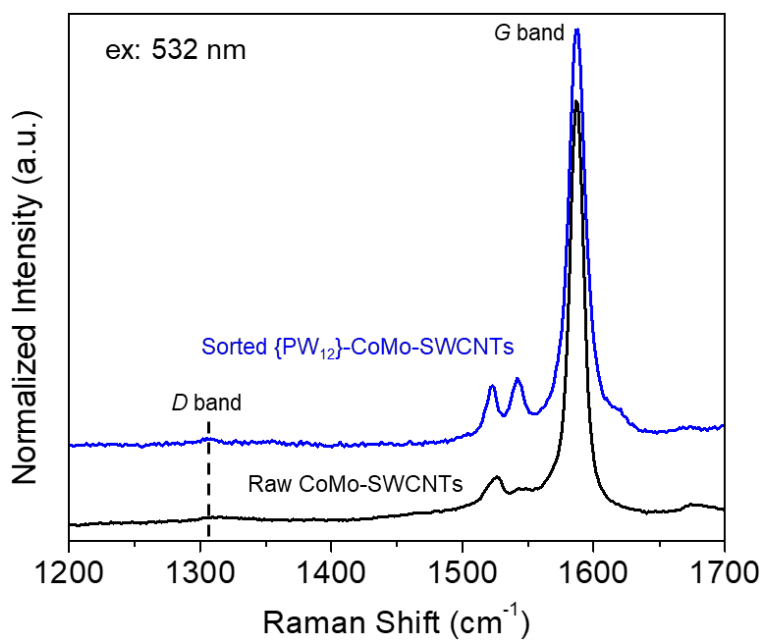

**Figure S6.** Raman spectra of sorted  $\{PW_{12}\}$ -CoMo-SWCNTs and raw CoMo-SWCNTs. The spectra are normalized with the *G* bands.

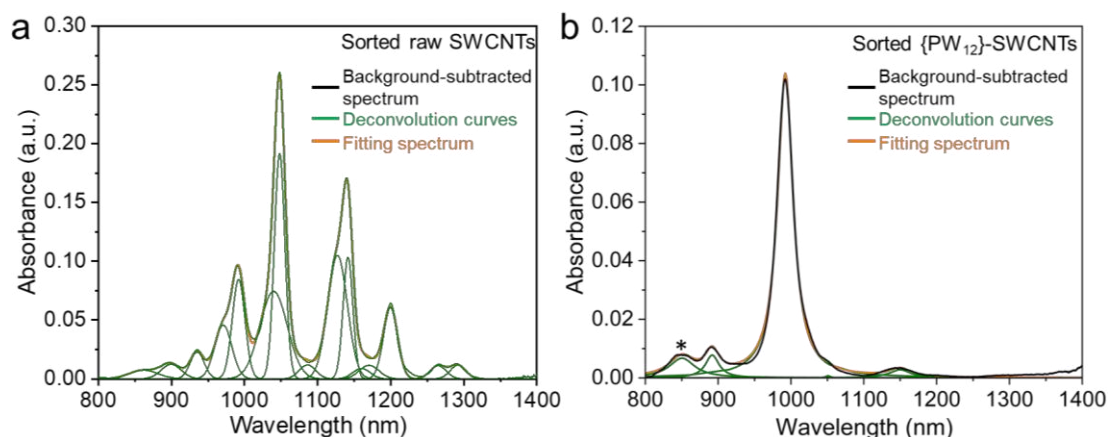

**Figure S7.** UV–Vis–NIR absorption spectra, deconvolution curves, and fitting spectra of PCz sorted raw SWCNTs (a) and {PW<sub>12</sub>}-SWCNTs (b).

**Table S1.** Fitted and calculated relative abundance of (*n,m*) in PCz sorted {PW<sub>12</sub>}-SWCNTs from absorption spectra.

| ( <i>n,m</i> ) | Wavelength (nm) | Peak Area | Relative Abundance (%) |
|----------------|-----------------|-----------|------------------------|
| (6,4)          | 891             | 0.27      | 5.9                    |
| (6,5)          | 992             | 4.14      | 90.6                   |
| (7,5)          | 1028            | 0.01      | 0.2                    |
| (7,6)          | 1146            | 0.15      | 3.3                    |

**Table S2.** Fitted and calculated relative abundance of (*n,m*) in PCz sorted raw SWCNTs from absorption spectra.

| ( <i>n,m</i> )  | Wavelength (nm) | Peak Area | Relative Abundance (%) |
|-----------------|-----------------|-----------|------------------------|
| (6,4)           | 899             | 0.42      | 2.7                    |
| (9,1)           | 935             | 0.55      | 3.6                    |
| (8,3)           | 970             | 1.34      | 8.8                    |
| (6,5)           | 992             | 1.85      | 12.1                   |
| (7,5)           | 1048            | 3.49      | 22.9                   |
| (7,6)(8,4)(9,4) | 1125-1160       | 5.54      | 36.3                   |
| (8,6)           | 1200            | 1.47      | 9.6                    |
| (8,7)           | 1265            | 0.30      | 2.0                    |
| (10,3)          | 1292            | 0.31      | 2.0                    |

Three types of adsorption sites of {PW<sub>12</sub>} on a (8,4) SWCNT were used. The smallest O<sub>cluster</sub>-C<sub>CNT</sub> inter-distance was found to be 1.44, 2.44, and 3.41 Å (**Figure**

**S8a–c**), respectively. The optimized configuration by DFT calculations is determined to be 3.40 Å (**Figure S8d**).

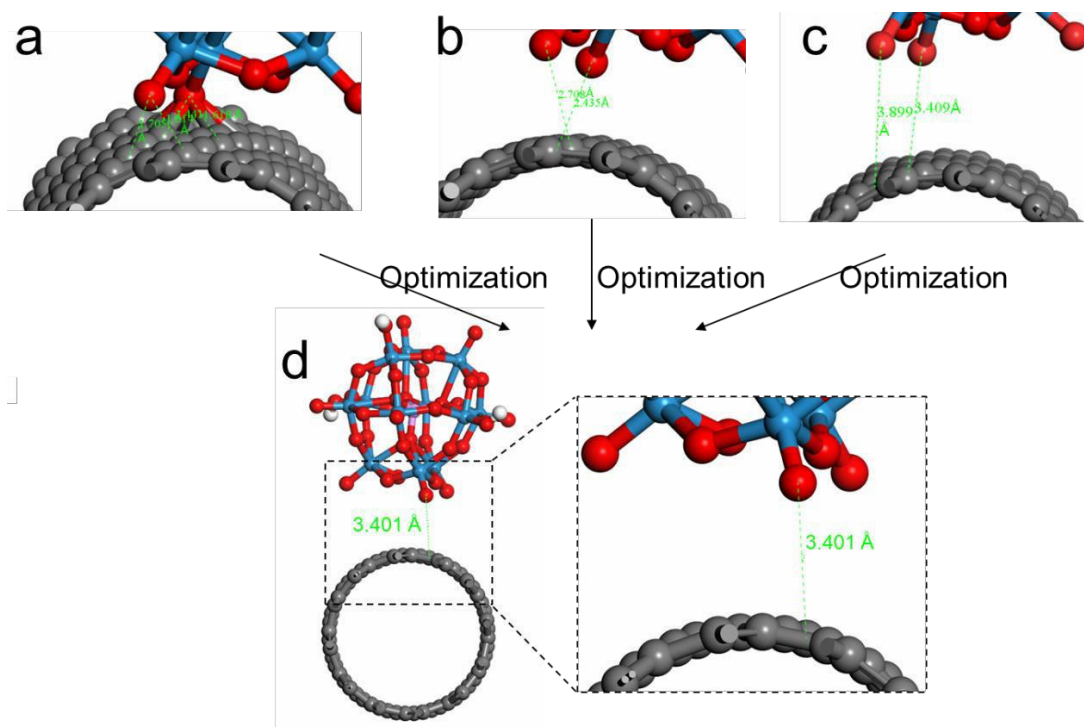

**Figure S8.** **a–c**, Different adsorption sites of {PW<sub>12</sub>} on (8,4) SWCNT before optimization. The smallest inter-distances (O-C) 1.44 (**a**), 2.44 (**b**), and 3.41 Å (**c**) are labelled. **d**, Optimized configuration of {PW<sub>12</sub>}/(8,4) SWCNT in tri-adsorption site with an inter-distance of 3.40 Å.

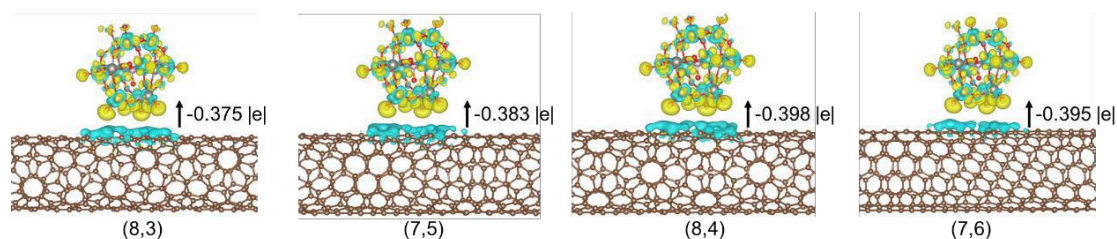

**Figure S9.** DFT calculations: iso-surface plots of electron density differences for {PW<sub>12</sub>} on outside SWCNTs with different chirality/diameter: (8,3), (7,5), (8,4), and (7,6). The corresponding electron transfer (|e|) is indicated.

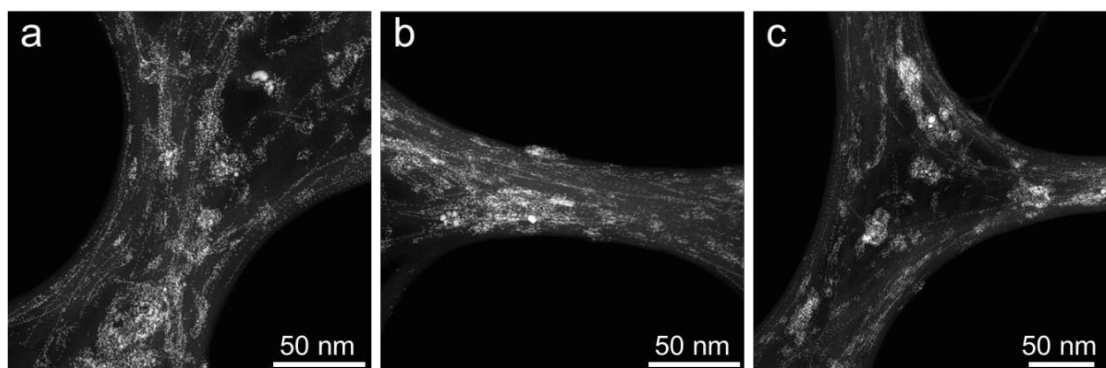

**Figure S10.** a–c, HAADF-STEM images of  $\{PW_{12}\}$ -SWCNT residue safter the sorting and centrifugation, showing lots of  $\{PW_{12}\}$  clusters adsorbed on outside SWCNTs.

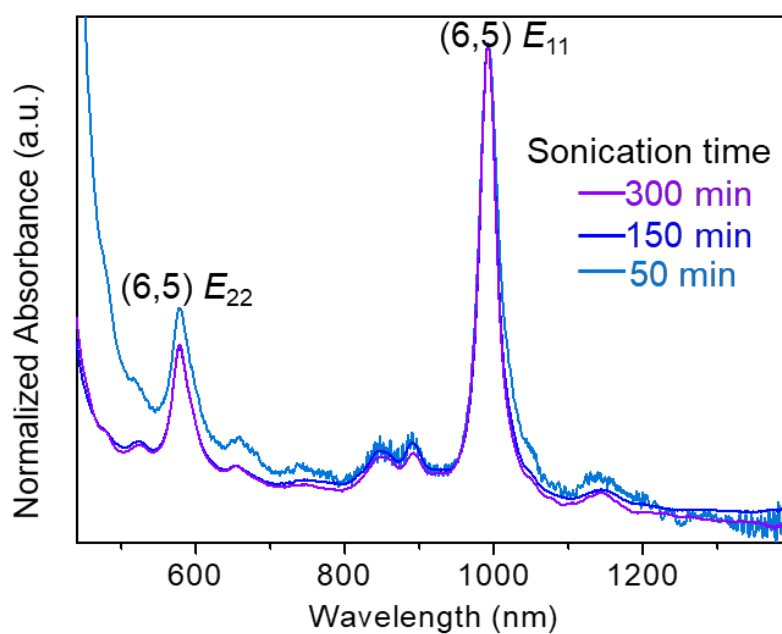

**Figure S11.** Normalized absorption spectra of PCz sorted  $\{PW_{12}\}$ -SWCNTs under different sonication time: 50, 150, and 300 min.



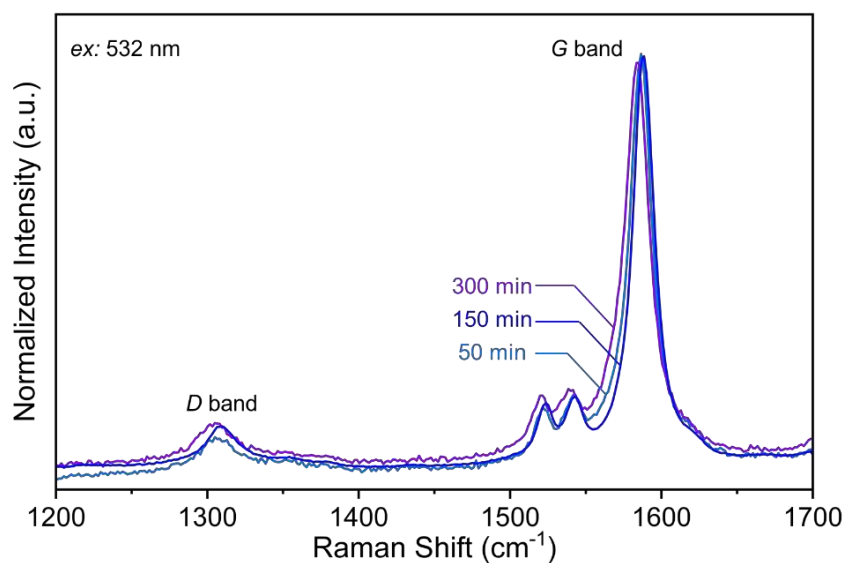

**Figure S12.** Raman spectrum showing the *D*, *G* bands of sorted SWCNTs via different sonication time.

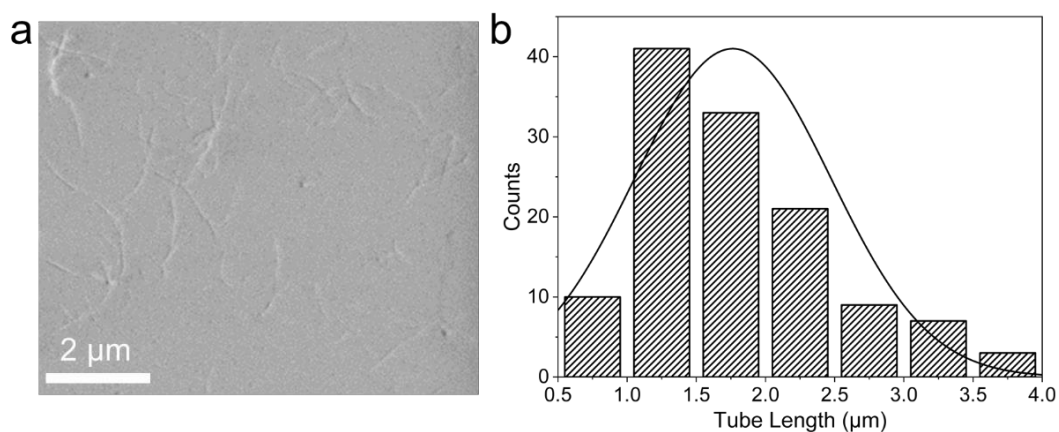

**Figure S13.** SEM image (a) and length distribution (b) of (6,5) SWCNTs sonicated by 300 min. Tube counts:  $N = 124$ . Average length:  $1.75 \pm 0.71 \mu\text{m}$ .

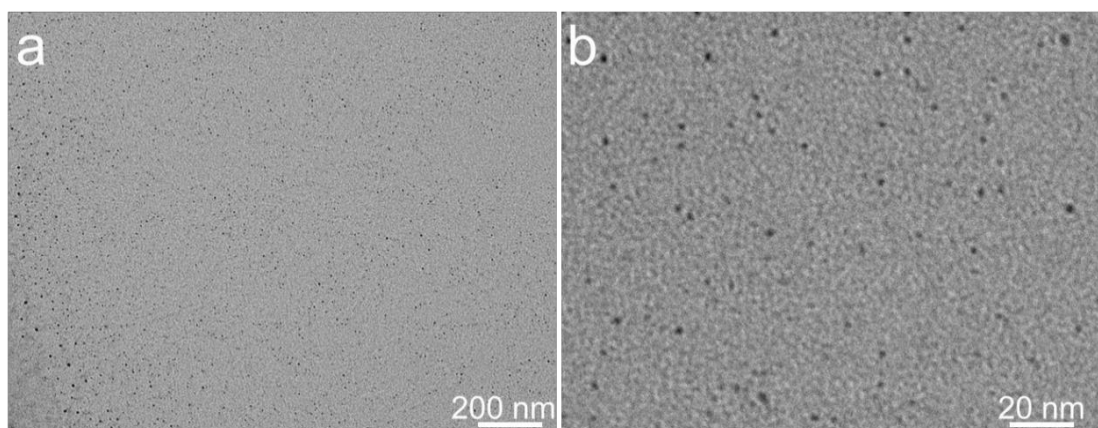

**Figure S14.** a, b, TEM images of Pd nanoparticles with a size of  $\sim 1\text{-}2 \text{ nm}$ .

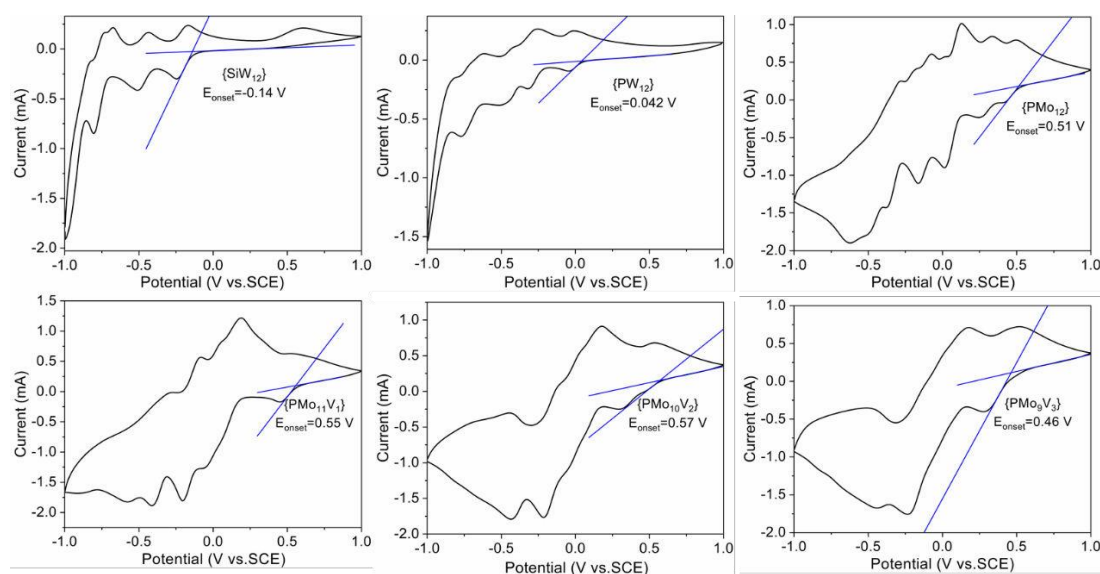

**Figure S15.** Cyclic voltammogram of different polyoxometalates in  $\text{Na}_2\text{SO}_4$  solution ( $0.5 \text{ mol}\cdot\text{L}^{-3}$ ) using a 3 mm-diameter glass carbon electrode, a carbon rod counter electrode, and a saturated calomel electrode (SCE) reference electrode.

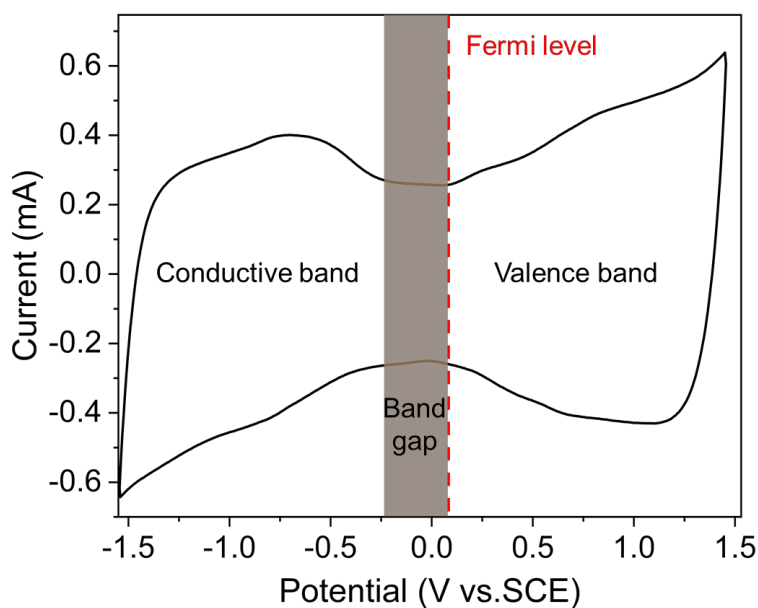

**Figure S16.** Cyclic voltammogram of CoMo-SWCNT thin film in  $\text{Na}_2\text{SO}_4$  solution ( $0.5 \text{ mol}\cdot\text{L}^{-3}$ ) using a 3 mm-diameter glass carbon electrode, a carbon rod counter electrode, and a  $\text{Ag}/\text{Ag}^+$  reference electrode. The potential (V vs.  $\text{Ag}/\text{Ag}^+$ ) of voltammogram of SWCNTs was converted to the potential (V vs. SCE) by subtracting 45 mV. The key features of the cyclic voltammogram are labeled.
